# Supplementary material for: Colonisation Patterns of Nosema ceranae in the Azores Archipelago
Source: MDPI journal article supplement (doi:10.3390/vetsci9070320), 2022-06-25
Supplement: s1 [file s1]

## Supplementary Materials

**Table S1.** Distribution of registered apiaries and colonies per island in 2013; and the corresponding theoretical sample sizes determined for an expected prevalence of *Nosema* species of 15%; a precision rate of 10% and a confidence level of 95%. Islands with *V. destructor* are represented in bold.

| Island        | Registered apiaries | Registered colonies | Number of apiaries to sample | Number of colonies to sample |
|---------------|---------------------|---------------------|------------------------------|------------------------------|
| Santa Maria   | 45                  | 231                 | 19                           | 57                           |
| São Miguel    | 272                 | 1802                | 30                           | 90                           |
| Terceira      | 123                 | 954                 | 26                           | 78                           |
| Graciosa      | 10                  | 167                 | 7                            | 21                           |
| São Jorge     | 36                  | 161                 | 17                           | 51                           |
| <b>Pico</b>   | 92                  | 1020                | 25                           | 75                           |
| <b>Faial</b>  | 49                  | 286                 | 20                           | 60                           |
| <b>Flores</b> | 29                  | 133                 | 15                           | 45                           |
| Total         | 656                 | 4754                | 159                          | 477                          |

**Table S2.** Metadata of sampled apiaries.

| Island | Sampling year | Apiary ID | multiplex PCR              | qPCR                       | Coordinate X | Coordinate Y |
|--------|---------------|-----------|----------------------------|----------------------------|--------------|--------------|
|        |               |           | Number of colonies sampled | Number of colonies sampled |              |              |
| Faial  | 2015          | F1        | 3                          | 2                          | -28.736      | 38.526       |
| Faial  | 2020          | F1        | 0                          | 4                          | -28.736      | 38.526       |
| Faial  | 2015          | F10       | 3                          | 3                          | -28.764      | 38.604       |
| Faial  | 2015          | F11       | 3                          | 3                          | -28.693      | 38.625       |
| Faial  | 2015          | F12       | 3                          | 3                          | -28.626      | 38.552       |
| Faial  | 2015          | F13       | 3                          | 2                          | -28.623      | 38.522       |
| Faial  | 2015          | F14       | 3                          | 3                          | -28.785      | 38.602       |
| Faial  | 2015          | F15       | 3                          | 2                          | -28.694      | 38.628       |
| Faial  | 2020          | F16       | 0                          | 3                          | -28.731      | 38.523       |
| Faial  | 2015          | F17       | 3                          | 2                          | -28.628      | 38.583       |
| Faial  | 2015          | F18       | 3                          | 3                          | -28.676      | 38.524       |
| Faial  | 2015          | F19       | 3                          | 3                          | -28.657      | 38.617       |
| Faial  | 2015          | F2        | 3                          | 3                          | -28.669      | 38.625       |
| Faial  | 2015          | F20       | 3                          | 3                          | -28.637      | 38.546       |
| Faial  | 2015          | F21       | 3                          | 3                          | -28.676      | 38.629       |
| Faial  | 2015          | F3        | 3                          | 3                          | -28.786      | 38.584       |
| Faial  | 2015          | F4        | 3                          | 3                          | -28.711      | 38.528       |
| Faial  | 2015          | F5        | 3                          | 2                          | -28.715      | 38.530       |
| Faial  | 2015          | F6        | 3                          | 3                          | -28.635      | 38.551       |
| Faial  | 2015          | F7        | 3                          | 2                          | -28.712      | 38.632       |
| Faial  | 2015          | F8        | 3                          | 3                          | -28.721      | 38.531       |
| Faial  | 2015          | F9        | 3                          | 3                          | -28.620      | 38.573       |
| Flores | 2015          | FL1       | 4                          | 4                          | -31.244      | 39.390       |
| Flores | 2015          | FL10      | 3                          | 3                          | -31.249      | 39.393       |
| Flores | 2015          | FL11      | 4                          | 3                          | -31.247      | 39.392       |
| Flores | 2015          | FL12      | 5                          | 4                          | -31.262      | 39.455       |
| Flores | 2015          | FL13      | 4                          | 0                          | -31.252      | 39.432       |

|           |      |      |   |   |         |        |
|-----------|------|------|---|---|---------|--------|
| Flores    | 2015 | FL2  | 4 | 2 | -31.153 | 39.401 |
| Flores    | 2015 | FL3  | 4 | 4 | -31.142 | 39.448 |
| Flores    | 2015 | FL4  | 3 | 2 | -31.144 | 39.468 |
| Flores    | 2015 | FL5  | 1 | 1 | -31.252 | 39.433 |
| Flores    | 2015 | FL6  | 2 | 2 | -31.166 | 39.387 |
| Flores    | 2015 | FL7  | 3 | 3 | -31.251 | 39.387 |
| Flores    | 2015 | FL8  | 3 | 3 | -31.238 | 39.379 |
| Flores    | 2015 | FL9  | 6 | 6 | -31.250 | 39.392 |
| Graciosa  | 2014 | G1   | 3 | 2 | -28.040 | 39.091 |
| Graciosa  | 2014 | G2   | 3 | 3 | -28.022 | 39.076 |
| Graciosa  | 2014 | G3   | 3 | 2 | -28.019 | 39.060 |
| Graciosa  | 2014 | G4   | 3 | 3 | -28.022 | 39.084 |
| Graciosa  | 2014 | G5   | 3 | 2 | -27.982 | 39.055 |
| Graciosa  | 2014 | G6   | 3 | 3 | -27.979 | 39.050 |
| Graciosa  | 2014 | G7   | 3 | 3 | -28.022 | 39.091 |
| Pico      | 2015 | P1   | 3 | 3 | -28.508 | 38.521 |
| Pico      | 2015 | P10  | 3 | 3 | -28.498 | 38.540 |
| Pico      | 2015 | P11  | 3 | 3 | -28.433 | 38.539 |
| Pico      | 2015 | P12  | 3 | 2 | -28.521 | 38.528 |
| Pico      | 2015 | P13  | 3 | 3 | -28.417 | 38.538 |
| Pico      | 2015 | P14  | 3 | 3 | -28.469 | 38.544 |
| Pico      | 2015 | P15  | 3 | 3 | -28.362 | 38.418 |
| Pico      | 2015 | P16  | 3 | 2 | -28.307 | 38.415 |
| Pico      | 2015 | P17  | 3 | 3 | -28.272 | 38.417 |
| Pico      | 2015 | P18  | 3 | 3 | -28.508 | 38.477 |
| Pico      | 2015 | P19  | 3 | 3 | -28.512 | 38.532 |
| Pico      | 2015 | P2   | 3 | 3 | -28.464 | 38.539 |
| Pico      | 2015 | P20  | 3 | 2 | -28.430 | 38.552 |
| Pico      | 2015 | P21  | 3 | 3 | -28.384 | 38.554 |
| Pico      | 2015 | P22  | 3 | 2 | -28.312 | 38.494 |
| Pico      | 2015 | P23  | 3 | 3 | -28.295 | 38.504 |
| Pico      | 2015 | P24  | 3 | 3 | -28.454 | 38.549 |
| Pico      | 2015 | P25  | 3 | 3 | -28.344 | 38.535 |
| Pico      | 2015 | P3   | 3 | 3 | -28.464 | 38.541 |
| Pico      | 2015 | P4   | 3 | 3 | -28.489 | 38.536 |
| Pico      | 2015 | P5   | 3 | 3 | -28.391 | 38.423 |
| Pico      | 2015 | P6   | 3 | 3 | -28.524 | 38.485 |
| Pico      | 2015 | P7   | 3 | 3 | -28.355 | 38.540 |
| Pico      | 2015 | P8   | 3 | 3 | -28.345 | 38.535 |
| Pico      | 2015 | P9   | 3 | 3 | -28.491 | 38.449 |
| São Jorge | 2015 | SJ1  | 3 | 2 | -28.169 | 38.667 |
| São Jorge | 2020 | SJ10 | 0 | 3 | -28.022 | 38.604 |
| São Jorge | 2014 | SJ11 | 3 | 1 | -28.272 | 38.731 |
| São Jorge | 2020 | SJ12 | 0 | 3 | -28.002 | 38.607 |
| São Jorge | 2015 | SJ13 | 3 | 1 | -27.796 | 38.537 |
| São Jorge | 2014 | SJ14 | 3 | 1 | -27.766 | 38.553 |
| São Jorge | 2020 | SJ14 | 0 | 3 | -27.766 | 38.553 |
| São Jorge | 2020 | SJ15 | 0 | 3 | -27.998 | 38.604 |
| São Jorge | 2014 | SJ16 | 3 | 0 | -28.152 | 38.661 |
| São Jorge | 2015 | SJ17 | 3 | 0 | -28.223 | 38.708 |
| São Jorge | 2015 | SJ18 | 3 | 0 | -28.133 | 38.658 |
| São Jorge | 2020 | SJ2  | 0 | 3 | -28.178 | 38.665 |

|             |      |       |   |   |         |        |
|-------------|------|-------|---|---|---------|--------|
| São Jorge   | 2015 | SJ20  | 2 | 0 | -28.013 | 38.603 |
| São Jorge   | 2015 | SJ21  | 3 | 0 | -28.177 | 38.670 |
| São Jorge   | 2020 | SJ3   | 0 | 3 | -28.181 | 38.674 |
| São Jorge   | 2015 | SJ4   | 3 | 1 | -28.258 | 38.725 |
| São Jorge   | 2014 | SJ5   | 3 | 2 | -27.981 | 38.603 |
| São Jorge   | 2020 | SJ6   | 0 | 3 | -28.123 | 38.647 |
| São Jorge   | 2020 | SJ7   | 0 | 3 | -28.117 | 38.641 |
| São Jorge   | 2015 | SJ7   | 3 | 2 | -28.117 | 38.641 |
| São Jorge   | 2020 | SJ8   | 0 | 3 | -28.118 | 38.642 |
| São Jorge   | 2014 | SJ9   | 3 | 3 | -28.037 | 38.612 |
| São Jorge   | 2020 | SJ9   | 0 | 3 | -28.037 | 38.612 |
| São Miguel  | 2014 | SM1   | 3 | 3 | -25.708 | 37.742 |
| São Miguel  | 2014 | SM10  | 3 | 2 | -25.583 | 37.754 |
| São Miguel  | 2014 | SM11  | 3 | 3 | -25.202 | 37.743 |
| São Miguel  | 2014 | SM12  | 3 | 3 | -25.639 | 37.779 |
| São Miguel  | 2014 | SM13  | 3 | 3 | -25.347 | 37.730 |
| São Miguel  | 2014 | SM14  | 3 | 3 | -25.840 | 37.844 |
| São Miguel  | 2014 | SM15  | 3 | 3 | -25.317 | 37.780 |
| São Miguel  | 2014 | SM16  | 3 | 3 | -25.795 | 37.891 |
| São Miguel  | 2014 | SM17  | 3 | 2 | -25.237 | 37.754 |
| São Miguel  | 2014 | SM18  | 3 | 3 | -25.149 | 37.789 |
| São Miguel  | 2014 | SM19  | 3 | 3 | -25.441 | 37.727 |
| São Miguel  | 2014 | SM2   | 3 | 3 | -25.637 | 37.767 |
| São Miguel  | 2014 | SM20  | 3 | 3 | -25.506 | 37.727 |
| São Miguel  | 2014 | SM21  | 3 | 2 | -25.480 | 37.810 |
| São Miguel  | 2014 | SM22  | 3 | 1 | -25.316 | 37.843 |
| São Miguel  | 2014 | SM23  | 3 | 2 | -25.698 | 37.837 |
| São Miguel  | 2014 | SM24  | 3 | 3 | -25.243 | 37.750 |
| São Miguel  | 2014 | SM25  | 3 | 3 | -25.650 | 37.756 |
| São Miguel  | 2014 | SM26  | 3 | 3 | -25.709 | 37.868 |
| São Miguel  | 2014 | SM27  | 3 | 2 | -25.793 | 37.857 |
| São Miguel  | 2014 | SM28  | 3 | 3 | -25.556 | 37.743 |
| São Miguel  | 2014 | SM29  | 3 | 2 | -25.665 | 37.751 |
| São Miguel  | 2014 | SM3   | 3 | 3 | -25.280 | 37.852 |
| São Miguel  | 2014 | SM30  | 3 | 3 | -25.637 | 37.754 |
| São Miguel  | 2014 | SM31  | 3 | 3 | -25.660 | 37.818 |
| São Miguel  | 2014 | SM32  | 3 | 3 | -25.152 | 37.831 |
| São Miguel  | 2014 | SM33  | 3 | 3 | -25.812 | 37.894 |
| São Miguel  | 2014 | SM4   | 3 | 3 | -25.225 | 37.846 |
| São Miguel  | 2014 | SM5   | 3 | 3 | -25.613 | 37.791 |
| São Miguel  | 2014 | SM6   | 3 | 3 | -25.487 | 37.723 |
| São Miguel  | 2014 | SM7   | 3 | 3 | -25.507 | 37.807 |
| São Miguel  | 2014 | SM8   | 3 | 3 | -25.814 | 37.827 |
| São Miguel  | 2014 | SM9   | 3 | 3 | -25.746 | 37.886 |
| Santa Maria | 2015 | STM1  | 3 | 1 | -25.114 | 36.995 |
| Santa Maria | 2020 | STM10 | 0 | 1 | -25.103 | 37.007 |
| Santa Maria | 2015 | STM11 | 3 | 3 | -25.095 | 37.004 |
| Santa Maria | 2015 | STM12 | 3 | 3 | -25.097 | 37.003 |
| Santa Maria | 2015 | STM13 | 3 | 1 | -25.122 | 36.966 |
| Santa Maria | 2015 | STM14 | 3 | 3 | -25.073 | 36.999 |
| Santa Maria | 2020 | STM15 | 0 | 1 | -25.037 | 36.970 |
| Santa Maria | 2015 | STM16 | 3 | 2 | -25.047 | 36.957 |

|             |      |       |   |   |         |        |
|-------------|------|-------|---|---|---------|--------|
| Santa Maria | 2015 | STM17 | 3 | 3 | -25.076 | 36.943 |
| Santa Maria | 2020 | STM18 | 0 | 3 | -25.133 | 36.984 |
| Santa Maria | 2015 | STM19 | 3 | 1 | -25.135 | 36.979 |
| Santa Maria | 2015 | STM2  | 3 | 3 | -25.149 | 36.997 |
| Santa Maria | 2020 | STM20 | 0 | 2 | -25.062 | 36.935 |
| Santa Maria | 2015 | STM21 | 3 | 2 | -25.126 | 37.000 |
| Santa Maria | 2015 | STM22 | 3 | 1 | -25.129 | 36.970 |
| Santa Maria | 2020 | STM23 | 0 | 2 | -25.135 | 36.956 |
| Santa Maria | 2020 | STM24 | 0 | 2 | -25.159 | 36.956 |
| Santa Maria | 2020 | STM25 | 0 | 2 | -25.124 | 36.979 |
| Santa Maria | 2015 | STM26 | 3 | 3 | -25.114 | 36.968 |
| Santa Maria | 2020 | STM26 | 0 | 3 | -25.114 | 36.968 |
| Santa Maria | 2020 | STM27 | 0 | 3 | -25.127 | 36.976 |
| Santa Maria | 2015 | STM28 | 3 | 3 | -25.069 | 36.987 |
| Santa Maria | 2015 | STM29 | 3 | 3 | -25.039 | 36.957 |
| Santa Maria | 2015 | STM3  | 3 | 2 | -25.096 | 36.955 |
| Santa Maria | 2015 | STM30 | 3 | 3 | -25.121 | 36.989 |
| Santa Maria | 2020 | STM4  | 0 | 3 | -25.168 | 36.991 |
| Santa Maria | 2015 | STM5  | 3 | 3 | -25.111 | 36.994 |
| Santa Maria | 2015 | STM6  | 3 | 3 | -25.116 | 36.964 |
| Santa Maria | 2015 | STM7  | 3 | 2 | -25.136 | 36.968 |
| Santa Maria | 2020 | STM8  | 0 | 3 | -25.115 | 36.993 |
| Santa Maria | 2020 | STM9  | 0 | 1 | -25.114 | 36.988 |
| Terceira    | 2020 | T1    | 0 | 3 | -27.106 | 38.737 |
| Terceira    | 2014 | T10   | 3 | 3 | -27.285 | 38.663 |
| Terceira    | 2014 | T11   | 3 | 2 | -27.237 | 38.676 |
| Terceira    | 2014 | T12   | 3 | 3 | -27.269 | 38.796 |
| Terceira    | 2014 | T13   | 3 | 3 | -27.074 | 38.678 |
| Terceira    | 2020 | T14   | 0 | 3 | -27.273 | 38.681 |
| Terceira    | 2020 | T15   | 0 | 3 | -27.115 | 38.742 |
| Terceira    | 2020 | T16   | 0 | 1 | -27.363 | 38.763 |
| Terceira    | 2014 | T17   | 3 | 2 | -27.197 | 38.794 |
| Terceira    | 2014 | T18   | 3 | 3 | -27.210 | 38.662 |
| Terceira    | 2014 | T2    | 2 | 2 | -27.105 | 38.758 |
| Terceira    | 2014 | T20   | 3 | 3 | -27.361 | 38.767 |
| Terceira    | 2020 | T20   | 0 | 3 | -27.361 | 38.767 |
| Terceira    | 2014 | T21   | 3 | 3 | -27.364 | 38.765 |
| Terceira    | 2014 | T22   | 3 | 3 | -27.276 | 38.786 |
| Terceira    | 2014 | T23   | 3 | 3 | -27.247 | 38.672 |
| Terceira    | 2014 | T24   | 3 | 3 | -27.096 | 38.727 |
| Terceira    | 2014 | T25   | 3 | 3 | -27.270 | 38.674 |
| Terceira    | 2014 | T26   | 3 | 3 | -27.164 | 38.759 |
| Terceira    | 2020 | T27   | 0 | 3 | -27.157 | 38.668 |
| Terceira    | 2014 | T28   | 3 | 2 | -27.348 | 38.780 |
| Terceira    | 2020 | T29   | 0 | 3 | -27.178 | 38.769 |
| Terceira    | 2014 | T3    | 3 | 3 | -27.194 | 38.793 |
| Terceira    | 2014 | T30   | 3 | 3 | -27.242 | 38.665 |
| Terceira    | 2014 | T31   | 3 | 3 | -27.140 | 38.649 |
| Terceira    | 2014 | T32   | 3 | 3 | -27.178 | 38.657 |
| Terceira    | 2020 | T32   | 0 | 3 | -27.178 | 38.657 |
| Terceira    | 2020 | T33   | 0 | 3 | -27.173 | 38.768 |
| Terceira    | 2014 | T34   | 3 | 3 | -27.215 | 38.676 |

|          |      |    |   |   |         |        |
|----------|------|----|---|---|---------|--------|
| Terceira | 2014 | T4 | 3 | 3 | -27.064 | 38.754 |
| Terceira | 2014 | T5 | 3 | 2 | -27.134 | 38.748 |
| Terceira | 2014 | T6 | 3 | 3 | -27.237 | 38.795 |
| Terceira | 2020 | T6 | 0 | 3 | -27.237 | 38.795 |
| Terceira | 2014 | T7 | 3 | 3 | -27.243 | 38.675 |
| Terceira | 2014 | T8 | 4 | 4 | -27.120 | 38.778 |
| Terceira | 2014 | T9 | 3 | 3 | -27.102 | 38.646 |

**Table S3.** Primers used for molecular detection of *N. ceranae*; *N. apis* and internal controls for *Apis mellifera*.

| Primer name | Sequence                                                                     | Locus                                 | Specificity         | Fragment length | Molecular method      | Source  |
|-------------|------------------------------------------------------------------------------|---------------------------------------|---------------------|-----------------|-----------------------|---------|
| 218MITOC    | 5'-<br>forward CGCCGACGATGTGATATGAAAATATTA<br>A-3'                           | 16S<br>rRNA                           | <i>N. ceranae</i>   | 218-219<br>bp   | multiplex<br>PCR/qPCR | [58;82] |
|             | 5'-<br>reverse CCCGGTCATTCTCAAACAAAAAACCG-<br>3'                             |                                       |                     |                 |                       |         |
|             | 5'-<br>forward GGGGGCATGTCTTTGACGTACTATGTA-<br>3'                            |                                       |                     |                 |                       |         |
| 321APIS     | 5'-<br>reverse GGGGGGCGTTTAAAATGTGAAACAAV<br>TATG-3'                         | 16S<br>rRNA                           | <i>N. apis</i>      | 321 bp          | multiplex<br>PCR      |         |
|             | 5'-<br>forward 5'-GGGTCCAAGACCAGGAAGTGGAT-3'                                 |                                       |                     |                 |                       |         |
|             | 5'-<br>reverse GCGCGGAAATTCCTGATATATGAAGA<br>GAAAA-3'                        |                                       |                     |                 |                       |         |
| COI         |                                                                              | mtDNA<br>cytochrome oxidase subunit I | <i>A. mellifera</i> | 119 bp          | multiplex<br>PCR      | [58]    |
| RPL8        | forward 5'-TGGATGTTCAACAGGGTTCATA-3'<br>reverse 5'-CTGGTGGTGGACGTATTGATAA-3' | RPL8                                  | <i>A. mellifera</i> | 121 bp          | qPCR                  | [59]    |

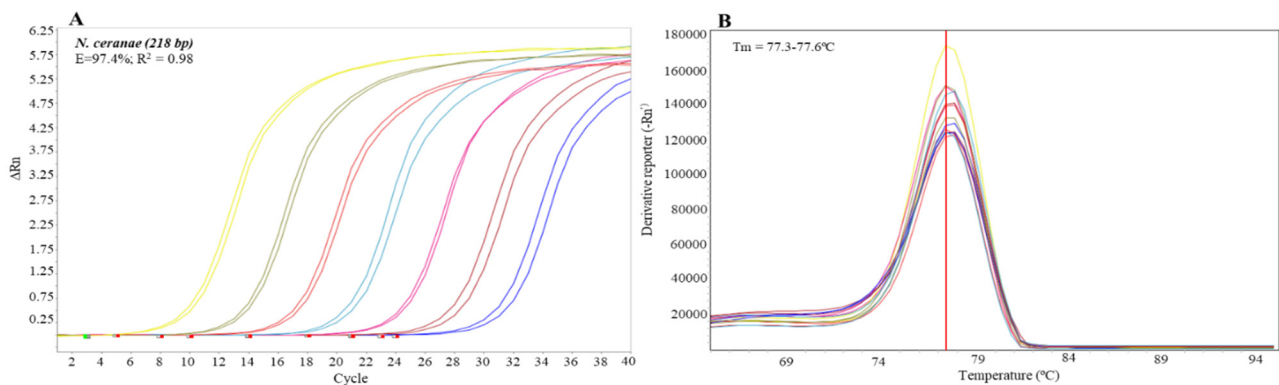

**Figure S1.** Real-time qPCR standard curves for *N. ceranae*. Amplification curves and melting profile (A; B) of ten-fold serial dilutions (7 points in duplicate).
